# Supplementary material for: Evolutionary couplings detect side-chain interactions
Source: PeerJ journal article supplement (doi:10.7717/peerj.7280), 2019-07-08

**A**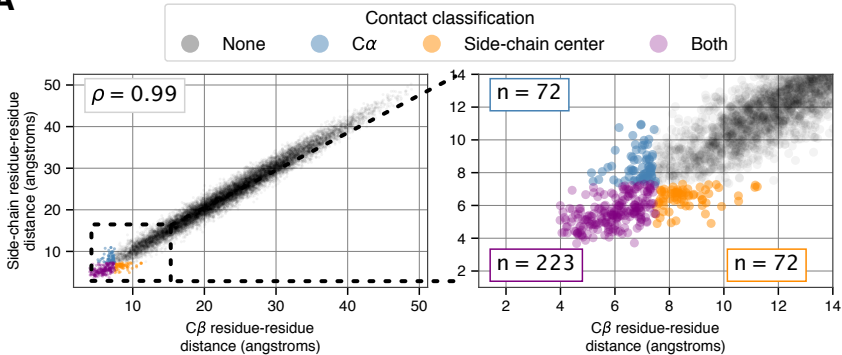**B**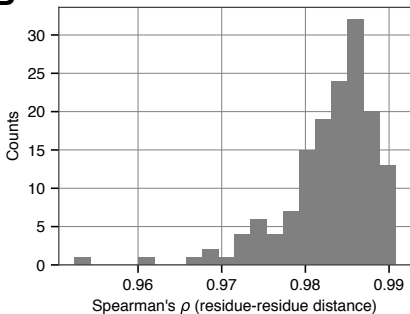**C**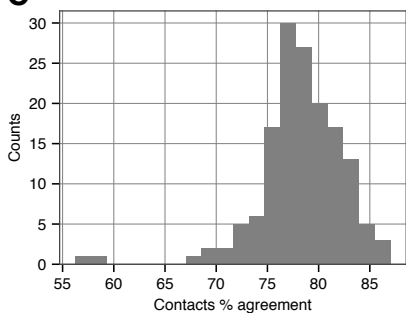

Supplement: SIFigS2.pdf [file SIFigS2.pdf]
