# Supplementary material for: Evolutionary couplings detect side-chain interactions
Source: PeerJ journal article supplement (doi:10.7717/peerj.7280), 2019-07-08

Spearman's  $\rho = 0.669$ 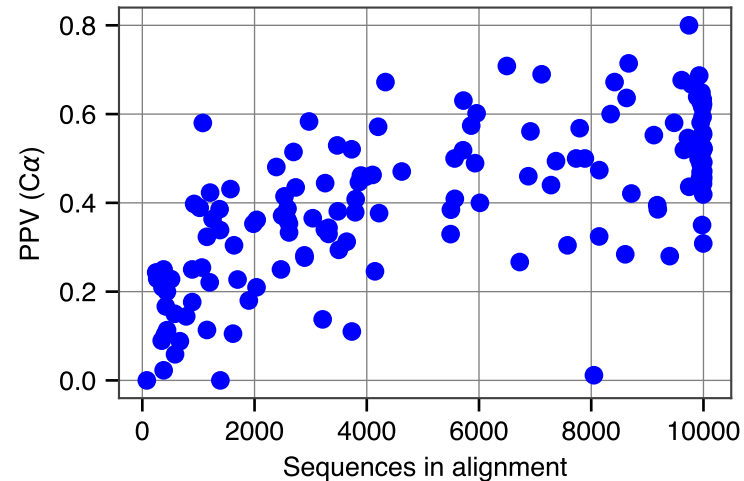Spearman's  $\rho = 0.681$ 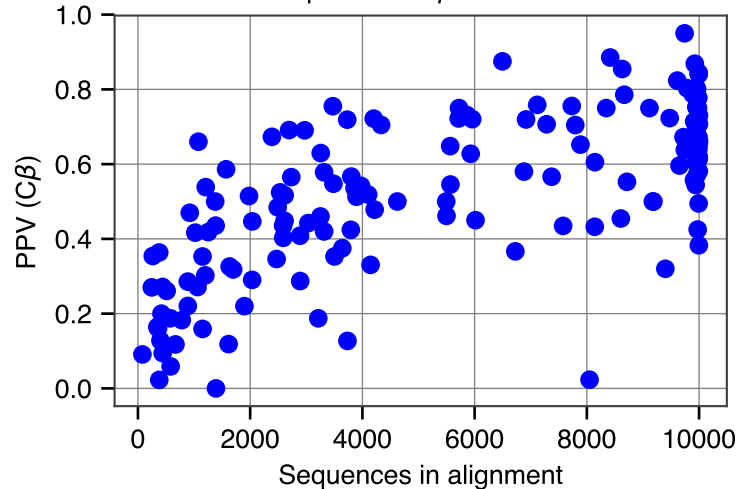Spearman's  $\rho = 0.684$ 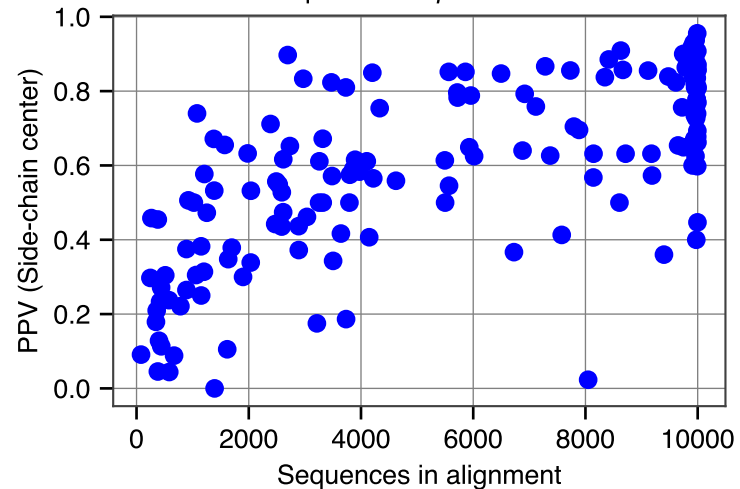

Supplement: SIFigS4.pdf [file SIFigS4.pdf]
