# Supplementary material for: Evolutionary couplings detect side-chain interactions
Source: PeerJ journal article supplement (doi:10.7717/peerj.7280), 2019-07-08

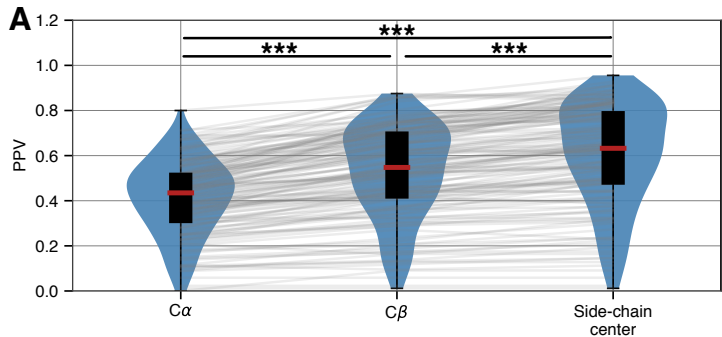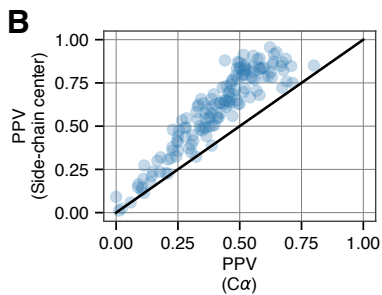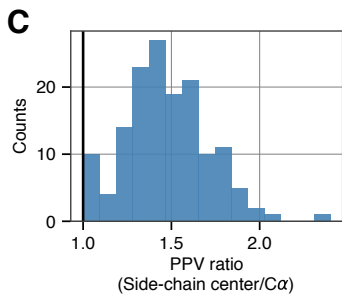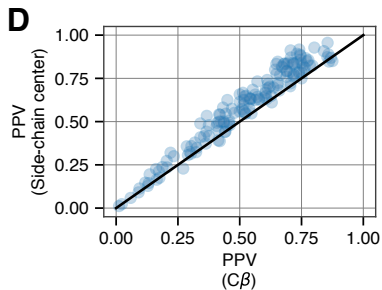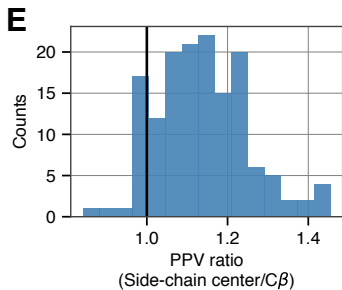

Supplement: SIFigS8.pdf [file SIFigS8.pdf]
